# Supplementary material
Source: PubMed Central journal article supplement (PMC3000461)
Supplement: tlo0306_0362SD1.pdf [file tlo0306_0362SD1.pdf]

**Table W1.** Summary of Demographics, Dosage, Apparent Contractile Propagation Velocity, and Period in Control Arm Subjects.

| Subject ID | Age | Sex | Ethnicity* | Dose ICG ( $\mu\text{g}$ ) | Side              | Apparent Propagation Velocity (mm/s) |         |        |               | Period (sec)            |            |        |                 |
|------------|-----|-----|------------|----------------------------|-------------------|--------------------------------------|---------|--------|---------------|-------------------------|------------|--------|-----------------|
|            |     |     |            |                            |                   | No. Velocity Measurements            | Range   | Median | Mean $\pm$ SD | No. Period Measurements | Range      | Median | Mean $\pm$ SD   |
| CA01       | 46  | F   | C          | 375                        | Left              | 23                                   | 0.4-2.7 | 0.7    | 0.9 $\pm$ 0.5 | 12                      | 9-66       | 36.5   | 39.1 $\pm$ 19.2 |
|            |     |     |            |                            | Right             | 19                                   | 0.3-1.0 | 0.8    | 0.7 $\pm$ 0.2 | 14                      | 15-65      | 20.0   | 24.3 $\pm$ 12.3 |
| CA02       | 59  | M   | C          | 375                        | Left              | 18                                   | 0.3-2.6 | 0.7    | 0.9 $\pm$ 0.6 | 9                       | 12.6-62.9  | 17.8   | 23.6 $\pm$ 16.0 |
|            |     |     |            |                            | Right             | 42                                   | 0.3-2.6 | 0.7    | 0.8 $\pm$ 0.5 | 23                      | 11.0-39.7  | 23.9   | 23.1 $\pm$ 8.9  |
| CA03       | 22  | M   | C          | 200                        | Left              | 135                                  | 0.3-2.6 | 0.9    | 0.9 $\pm$ 0.3 | 57                      | 3.4-117.1  | 42.2   | 48.6 $\pm$ 27.9 |
|            |     |     |            |                            | Right             | 105                                  | 0.4-4.9 | 0.9    | 1.0 $\pm$ 0.6 | 31                      | 9.5-81.4   | 30.3   | 33.8 $\pm$ 19.7 |
| CA04       | 41  | F   | C          | 200                        | Left              | 36                                   | 0.4-2.5 | 1.0    | 1.2 $\pm$ 0.5 | 11                      | 15.0-82.6  | 56.4   | 48.6 $\pm$ 23.7 |
|            |     |     |            |                            | Right             | 87                                   | 0.3-3.1 | 0.8    | 0.9 $\pm$ 0.4 | 32                      | 8.9-138.2  | 25.7   | 41.0 $\pm$ 35.1 |
| CA05       | 46  | F   | C          | 200                        | Left              | 32                                   | 0.4-2.1 | 0.8    | 0.9 $\pm$ 0.4 | 13                      | 3.5-199.6  | 47.0   | 60.0 $\pm$ 53.4 |
|            |     |     |            |                            | Right             | 46                                   | 0.4-1.8 | 0.8    | 0.9 $\pm$ 0.3 | 11                      | 10.5-43.1  | 29.1   | 29.2 $\pm$ 11.2 |
| CA06       | 50  | F   | AA         | 200                        | Left <sup>†</sup> | 47                                   | 0.4-1.3 | 0.8    | 0.8 $\pm$ 0.2 | 34                      | 18.5-157.7 | 28.6   | 32.9 $\pm$ 23.2 |
|            |     |     |            |                            | Right             | 105                                  | 0.3-1.1 | 0.8    | 0.8 $\pm$ 0.2 | 75                      | 7.7-106.1  | 22.8   | 27.1 $\pm$ 15.4 |
| CA07       | 36  | F   | C          | 200                        | Left              | 112                                  | 0.2-4.3 | 0.9    | 0.9 $\pm$ 0.5 | 53                      | 2.3-85.0   | 29.5   | 32.5 $\pm$ 18.7 |
|            |     |     |            |                            | Right             | 36                                   | 0.3-2.3 | 0.8    | 0.9 $\pm$ 0.4 | 18                      | 12.5-116.7 | 74.6   | 67.1 $\pm$ 36.4 |
| CA08       | 48  | F   | C          | 200                        | Left              | 37                                   | 0.3-1.6 | 0.7    | 0.8 $\pm$ 0.3 | 10                      | 7.7-133.0  | 42.2   | 56.8 $\pm$ 45.7 |
|            |     |     |            |                            | Right             | 75                                   | 0.4-1.7 | 0.8    | 0.8 $\pm$ 0.2 | 42                      | 9.3-173.4  | 40.1   | 47.8 $\pm$ 35.8 |
| CA09       | 35  | F   | AA         | 200                        | Left              | 12                                   | 0.2-0.7 | 0.4    | 0.4 $\pm$ 0.2 | 3                       | 41.0-54.8  | 45.2   | 47.0 $\pm$ 7.1  |
|            |     |     |            |                            | Right             | 15                                   | 0.2-0.8 | 0.5    | 0.5 $\pm$ 0.1 | 6                       | 30.5-57.4  | 39.8   | 42.5 $\pm$ 11.8 |
| CA10       | 41  | F   | H          | 300                        | Left              | 61                                   | 0.2-2.4 | 0.7    | 0.8 $\pm$ 0.4 | 33                      | 13.1-77.9  | 30.3   | 33.3 $\pm$ 13.4 |
|            |     |     |            |                            | Right             | 48                                   | 0.1-1.5 | 0.9    | 0.8 $\pm$ 0.3 | 28                      | 15.8-71.5  | 26.4   | 31.7 $\pm$ 13.4 |
| CA11       | 35  | F   | C          | 300                        | Left              | 21                                   | 0.3-1.1 | 0.5    | 0.6 $\pm$ 0.2 | 15                      | 27.0-208.9 | 55.4   | 64.9 $\pm$ 47.0 |
|            |     |     |            |                            | Right             | 131                                  | 0.2-1.0 | 0.6    | 0.6 $\pm$ 0.1 | 107                     | 16.1-188.7 | 36.7   | 46.5 $\pm$ 28.2 |
| CA12       | 37  | M   | A          | 300                        | Left              | 75                                   | 0.4-1.0 | 0.6    | 0.6 $\pm$ 0.1 | 51                      | 7.0-205.1  | 71.3   | 78.1 $\pm$ 48.9 |
|            |     |     |            |                            | Right             | 175                                  | 0.1-1.2 | 0.5    | 0.6 $\pm$ 0.2 | 115                     | 9.0-250.5  | 77.7   | 82.0 $\pm$ 46.6 |

\*A indicates Asian; AA, African American; C, Caucasian; and H, Hispanic.

<sup>†</sup>Observed tortuous vessel (T).**Table W2.** Summary of Demographics, Dosage, Apparent Contractile Propagation Velocity, and Period in Control Leg Subjects.

| Subject ID | Age | Sex | Ethnicity* | Dose ICG ( $\mu\text{g}$ ) | Side <sup>†</sup> | Features <sup>‡</sup> | Apparent Propagation Velocity (cm/sec) |          |        |               | Period (sec)            |            |        |                 |
|------------|-----|-----|------------|----------------------------|-------------------|-----------------------|----------------------------------------|----------|--------|---------------|-------------------------|------------|--------|-----------------|
|            |     |     |            |                            |                   |                       | No. Velocity Measurements              | Range    | Median | Mean $\pm$ SD | No. Period Measurements | Range      | Median | Mean $\pm$ SD   |
| CL01       | 46  | F   | C          | 400                        | Left              | T                     | 44                                     | 0.3-2.7  | 0.8    | 1.0 $\pm$ 0.6 | 20                      | 15-93      | 30.5   | 38.1 $\pm$ 21.9 |
|            |     |     |            |                            | Right             | —                     | 36                                     | 0.3-1.6  | 0.9    | 0.9 $\pm$ 0.3 | 22                      | 7-167      | 69.0   | 69.5 $\pm$ 38.2 |
| CL02       | 23  | M   | C          | 262.5                      | Left              | —                     | 27                                     | 0.6-6.1  | 1.9    | 2.2 $\pm$ 1.4 | 16                      | 7.6-153.9  | 13.8   | 40.5 $\pm$ 47.6 |
|            |     |     |            |                            | Right             | —                     | 8                                      | 0.8-1.8  | 1.3    | 1.3 $\pm$ 0.4 | 0                       | —          | —      | —               |
| CL03       | 29  | F   | C          | 400                        | Left              | —                     | 45                                     | 0.3-1.4  | 0.6    | 0.7 $\pm$ 0.3 | 10                      | 31.4-118.2 | 45.6   | 63.6 $\pm$ 33.1 |
|            |     |     |            |                            | Right             | —                     | 42                                     | 0.3-1.9  | 0.7    | 0.8 $\pm$ 0.4 | 15                      | 14.2-95.1  | 46.3   | 49.1 $\pm$ 24.7 |
| CL04       | 27  | F   | C          | 350                        | Left              | —                     | 68                                     | 0.4-3.2  | 0.9    | 1.1 $\pm$ 0.6 | 16                      | 9.6-169.0  | 63.1   | 70.3 $\pm$ 40.1 |
|            |     |     |            |                            | Right             | R                     | 1                                      | -1.5     | -1.5   | —             | 0                       | —          | —      | —               |
| CL05       | 29  | F   | C          | 375                        | Back              | —                     | 15                                     | 0.3-1.6  | 0.8    | 0.8 $\pm$ 0.4 | 1                       | 78.3       | 78.3   | —               |
|            |     |     |            |                            | Right             | —                     | 29                                     | 0.5-2.0  | 0.8    | 0.9 $\pm$ 0.4 | 6                       | 41.2-110.6 | 57.9   | 65.1 $\pm$ 27.7 |
| CL06       | 35  | F   | C          | 400                        | Left              | R                     | 1                                      | -0.4     | -0.4   | —             | 0                       | —          | —      | —               |
|            |     |     |            |                            | Right             | T                     | 23                                     | 0.5-1.4  | 0.7    | 0.8 $\pm$ 0.3 | 5                       | 15.5-97.5  | 57.5   | 52.0 $\pm$ 31.2 |
| CL07       | 52  | F   | C          | 350                        | Left              | —                     | 5                                      | 0.8-1.2  | 0.9    | 1.0-0.2       | 0                       | —          | —      | —               |
|            |     |     |            |                            | Right             | —                     | 19                                     | 0.3-2.1  | 0.8    | 1.0 $\pm$ 0.5 | 7                       | 15.9-85.3  | 28.5   | 39.7 $\pm$ 25.1 |
| CL08       | 40  | F   | A          | 400                        | Left              | T                     | 53                                     | 0.2-2.4  | 0.7    | 0.8 $\pm$ 0.4 | 17                      | 10.3-96.6  | 20.9   | 33.4 $\pm$ 28.6 |
|            |     |     |            |                            | Right             | EF                    | 45                                     | 0.2-1.2  | 0.6    | 0.6 $\pm$ 0.3 | 22                      | 10.1-132.3 | 35.9   | 40.4 $\pm$ 27.7 |
| CL09       | 25  | F   | C          | 400                        | Left              | —                     | 35                                     | 0.2-2.3  | 0.6    | 0.7 $\pm$ 0.4 | 15                      | 6.9-125.0  | 33.2   | 35.1 $\pm$ 27.9 |
|            |     |     |            |                            | Right             | —                     | 45                                     | 0.3-1.9  | 0.6    | 0.8 $\pm$ 0.4 | 29                      | 13.8-110.2 | 33.9   | 42.1 $\pm$ 24.0 |
| CL10       | 34  | F   | C          | 400                        | Left              | —                     | 42                                     | 0.2-2.5  | 0.8    | 1.1 $\pm$ 0.7 | 21                      | 3.2-193.8  | 82.4   | 78.1 $\pm$ 54.6 |
|            |     |     |            |                            | Right             | —                     | 3                                      | 0.3-1.1  | 0.7    | 0.7 $\pm$ 0.4 | 0                       | —          | —      | —               |
| CL11       | 22  | M   | C          | 400                        | Left              | —                     | 20                                     | 0.4-1.4  | 0.9    | 0.9 $\pm$ 0.2 | 12                      | 12.3-125.4 | 78.4   | 77.0 $\pm$ 37.5 |
|            |     |     |            |                            | Right             | —                     | 17                                     | 0.3-1.8  | 0.8    | 0.9 $\pm$ 0.5 | 5                       | 32.5-110.3 | 51.3   | 64.3 $\pm$ 34.9 |
| CL12       | 59  | F   | C          | 400                        | Left              | T, H                  | 30                                     | 0.1-1.7  | 0.8    | 0.7 $\pm$ 0.4 | 10                      | 27.6-107.4 | 58.0   | 58.5 $\pm$ 23.5 |
|            |     |     |            |                            | Right             | —                     | 12                                     | 0.4-1.3  | 1.0    | 0.9 $\pm$ 0.3 | 3                       | 50.0-107.0 | 55.4   | 70.8 $\pm$ 31.5 |
| CL12       | 59  | F   | C          | 400                        | Left              | —                     | 36                                     | 0.4-2.7  | 0.9    | 1.0 $\pm$ 0.5 | 12                      | 28.3-83.3  | 40.5   | 44.3 $\pm$ 15.4 |
|            |     |     |            |                            | Right             | —                     | 33                                     | 0.1-11.7 | 1.0    | 1.4 $\pm$ 2.0 | 9                       | 4.8-152.6  | 31.9   | 43.9 $\pm$ 46.5 |

\*A indicates Asian; AA, African American; C, Caucasian; and H, Hispanic.

<sup>†</sup>Back = Backward movement.<sup>‡</sup>Features noted include tortuous vessels (T), hyperplastic lymphatic networks (H), extravascular fluorescence (EF), and reflux or retrograde propagation (R).

**Table W3.** Summary of Demographics, Dosage, Disease Cause, Apparent Contractile Propagation Velocity, and Period in Subjects with Unilateral Arm Lymphedema.

| Subject ID | Age | Sex | Ethnicity* | Dose ICG (µg) | Cause and Comments                                                                                                                          | Diagnosis, Side†                    | Features‡                        | Apparent Propagation Velocity (cm/sec)   |                    |                                      | Period (sec)   |                                     |                      |                                         |
|------------|-----|-----|------------|---------------|---------------------------------------------------------------------------------------------------------------------------------------------|-------------------------------------|----------------------------------|------------------------------------------|--------------------|--------------------------------------|----------------|-------------------------------------|----------------------|-----------------------------------------|
|            |     |     |            |               |                                                                                                                                             |                                     |                                  | No. Velocity Measurements                | Range              | Median                               | Mean ± SD      | No. Period Measurements             | Range                | Median                                  |
| LA01       | 46  | F   | C          | 400           | Onset after mastectomy. Had spontaneous fistula for lymph drainage in palm of symptomatic hand.                                             | Symp, L<br>Symp, L, Back<br>Asym, R | EF<br>ABP<br>—                   | —<br>-4.2 to -0.5<br>0.2 to 1.0          | —<br>-1.0<br>0.5   | 0<br>-1.5 ± 1.3<br>0.5 ± 0.3         | 0<br>9<br>0    | —<br>15.9-24.3<br>—                 | —<br>20.9<br>—       | —<br>20.7 ± 2.7<br>—                    |
| LA02       | 66  | F   | C          | 300           | Onset after mastectomy.                                                                                                                     | Asym, L<br>Symp, R                  | EF, H, T<br>EF, H, T             | 0.5 to 3.3<br>0.2                        | 0.9<br>0.2         | 1.0 ± 0.5<br>0.2                     | 27<br>1        | 3.5-78.8<br>56.9                    | 31.5<br>56.9         | 38.5 ± 23.4<br>56.9                     |
| LA03       | 62  | F   | C          | 300           | Onset after mastectomy (right), had second mastectomy (left) 9 years after the first. Edema commenced ~1 year before the second mastectomy. | Asym, L<br>Asym, L, Back<br>Symp, R | H, R<br>H, R<br>EF, H            | 0.5 to 1.6<br>-1.2 to -0.6<br>0.4 to 4.1 | 0.9<br>-0.9<br>1.6 | 0.9 ± 0.4<br>-0.9 ± 0.4<br>1.8 ± 1.0 | 7<br>1<br>9    | 11.3-117.0<br>67.4<br>8.4-54.6      | 37.6<br>67.4<br>12.0 | 48.0 ± 41.5<br>67.4<br>19.2 ± 14.5      |
| LA04       | 48  | F   | C          | 312.5         | Onset after melanoma surgery.                                                                                                               | Symp, L                             | EF                               | 0.6 to 2.2                               | 1.1                | 1.1 ± 0.4                            | 8              | 11.0-82.5                           | 44.5                 | 43.6 ± 20.0                             |
| LA05       | 56  | F   | H          | 325           | Bilateral lymphedema on legs. Onset after mastectomy.                                                                                       | Asym, R<br>Asym, L<br>Symp, R       | —<br>—<br>H, T                   | 0.5 to 1.3<br>0.2 to 1.2<br>0.2 to 1.4   | 0.8<br>0.5<br>0.4  | 0.8 ± 0.2<br>0.6 ± 0.3<br>0.4 ± 0.3  | 6<br>33<br>11  | 6.4-15.3<br>16.5-117.3<br>18.7-24.5 | 10.7<br>38.1<br>22.2 | 10.9 ± 3.4<br>45.4 ± 28.4<br>22.1 ± 1.7 |
| LA06       | 68  | F   | C          | 300           | Onset after mastectomy.                                                                                                                     | Symp, L<br>Asym, R                  | EF, H, T<br>—                    | 0.4 to 3.1<br>0.3 to 1.6                 | 0.8<br>0.6         | 1.0 ± 0.8<br>0.6 ± 0.3               | 10<br>14       | 14.5-75.0<br>11.9-140.0             | 32.5<br>35.1         | 37.1 ± 20.5<br>44.6 ± 34.3              |
| LA07       | 67  | F   | C          | 300           | Onset after lumpectomy and axillary dissection.                                                                                             | Symp, L<br>Asym, R                  | EF, H,<br>—                      | 0.8<br>0.1 to 4.9                        | 0.8<br>0.9         | 0.8<br>0.9 ± 0.5                     | 0<br>99        | —<br>2.8-200.0                      | —<br>27.8            | —<br>33.3 ± 27.4                        |
| LA08       | 81  | F   | C          | 250           | Onset after mastectomy.                                                                                                                     | Asym, L<br>Symp, R                  | —<br>H, T                        | 0.2 to 1.2<br>0.7 to 1.2                 | 0.6<br>0.9         | 0.6 ± 0.2<br>0.9 ± 0.2               | 24<br>9        | 22.3-111.0<br>16.1-24.7             | 49.8<br>23.5         | 53.6 ± 23.7<br>21.9 ± 3.3               |
| LA09       | 57  | F   | C          | 300           | Onset after mastectomy.                                                                                                                     | Asym, L<br>Symp, R                  | —<br>EF, H, T                    | 0.4 to 2.9<br>0.1 to 1.7                 | 0.8<br>0.5         | 0.9 ± 0.4<br>0.6 ± 0.5               | 19<br>1        | 5.7-139.4<br>25.0                   | 56.9<br>25.0         | 58.1 ± 39.6<br>25.0                     |
| LA10       | 49  | F   | C          | 300           | Onset after mastectomy                                                                                                                      | Symp, R, Back<br>Symp, L<br>Asym, R | EF, H, T<br>EF, H, T<br>EF, H, T | -0.3<br>0.5 to 2.0<br>0.1 to 2.5         | -0.3<br>0.8<br>0.6 | -0.3<br>0.8 ± 0.3<br>0.7 ± 0.3       | 0<br>39<br>172 | —<br>5.0-84.0<br>2.8-148.4          | —<br>36.1<br>27.7    | —<br>38.7 ± 19.2<br>38.5 ± 28.1         |

\*A indicates Asian; AA, African American; C, Caucasian; and H, Hispanic.

†Asym indicates asymptomatic; Symp, symptomatic; L, left; R, right; and Back, backward movement.

‡Features noted include tortuous vessels (T), hyperplastic lymphatic networks (H), extravascular fluorescence (EF), reflux or retrograde propagation (R), and active backward propulsion (ABP).

**Table W4.** Summary of Demographics, Dosage, Disease Cause, Apparent Contractile Propagation Velocity, and Period in Subjects with Unilateral Leg Lymphedema.

| Subject ID | Age | Sex | Ethnicity* | Dose ICG (µg) | Cause and Comments                                                                            | Diagnosis, Side†   | Features‡ | Apparent Propagation Velocity (cm/sec) |       |           | Period (sec) |                         |       |             |           |
|------------|-----|-----|------------|---------------|-----------------------------------------------------------------------------------------------|--------------------|-----------|----------------------------------------|-------|-----------|--------------|-------------------------|-------|-------------|-----------|
|            |     |     |            |               |                                                                                               |                    |           | No. Velocity Measurements              | Range | Median    | Mean ± SD    | No. Period Measurements | Range | Median      | Mean ± SD |
|            |     |     |            |               |                                                                                               |                    |           |                                        |       |           |              |                         |       |             |           |
| LL01       | 18  | F   | C          | 400           | Onset at age 18 with unknown cause (no record of trauma or surgical procedure).               | Symp, L<br>Asym, R | EF        | —                                      | —     | —         | 0            | —                       | —     | —           |           |
|            |     |     |            |               |                                                                                               |                    | —         | 0.6-1.5                                | 1.0   | 1.0 ± 0.4 | 0            | —                       | —     | —           |           |
| LL02       | 66  | F   | C          | 400           | Onset after cancer surgery.                                                                   | Symp, L<br>Asym, R | H, T      | 0.2-0.8                                | 0.6   | 0.6 ± 0.2 | 11           | 0.6-1.3                 | 1.0   | 0.6 ± 0.2   |           |
| LL03       | 36  | F   | C          | 400           | Onset after trauma (foot sprain).                                                             | Symp, L<br>Asym, R | H, T; EF  | 0.5-0.8                                | 0.7   | 1.0 ± 0.2 | 15           | 0.3-1.5                 | 0.7   | 1.0 ± 0.2   |           |
| LL04       | 20  | F   | C          | 400           | Onset after multiple leg injuries.                                                            | Symp, L<br>Asym, R | H, T; EF  | 0.3-1.9                                | 0.8   | 0.7 ± 0.1 | 14           | 0.2-2.7                 | 1.0   | 0.7 ± 0.3   |           |
| LL05       | 23  | F   | AA         | 400           | Onset occurred after insect bite.                                                             | Symp, L<br>Asym, R | EF        | 0.2-1.1                                | 0.4   | 0.9 ± 0.4 | 62           | —                       | —     | 1.1 ± 0.6   |           |
| LL06       | 48  | F   | AA         | 350           | Unknown cause, possibly due to pressure from large, untreated fibroid cyst in uterine system. | Symp, L<br>Asym, R | EF; H, T  | 0.5-0.5                                | 0.5   | —         | 0            | —                       | —     | —           |           |
|            |     |     |            |               |                                                                                               |                    | H, T      | 0.6-1.6                                | 0.7   | 0.5 ± 0.3 | 6            | 0.2-1.1                 | 0.4   | 0.5 ± 0.3   |           |
|            |     |     |            |               |                                                                                               |                    | H, T      | —                                      | —     | 0.5 ± 0.0 | 2            | 0.5-0.5                 | 0.5   | 0.5 ± 0.0   |           |
|            |     |     |            |               |                                                                                               |                    | H, T      | —                                      | —     | 1.0 ± 0.6 | 3            | 41.7-42.5               | 42.1  | 42.1 ± 0.6  |           |
| LL07       | 40  | F   | AA         | 400           | Onset after spider bite on toe, also had fibroid cysts in groin.                              | Asym, L<br>Symp, R | T         | 0.1-0.8                                | 0.5   | 0.5 ± 0.2 | 20           | 0.1-1.4                 | 0.7   | 0.5 ± 0.2   |           |
|            |     |     |            |               |                                                                                               |                    | H, T; EF  | —                                      | —     | 0.7 ± 0.4 | 15           | 12.4-229.5              | 36.9  | 71.8 ± 74.8 |           |
|            |     |     |            |               |                                                                                               |                    |           | —                                      | —     | —         | 6            | 6.0-228.3               | 62.9  | 83.6 ± 89.7 |           |
| LL08       | 31  | M   | C          | 400           | Onset at age 10 with unknown cause.                                                           | Symp, L<br>Asym, R | H, T      | 0.4-1.9                                | 1.3   | 1.2 ± 0.5 | 11           | 0.4-1.9                 | 1.3   | 1.2 ± 0.5   |           |
| LL09       | 47  | F   | C          | 50            | Onset after cancer surgery. Subject declined additional injections.                           | Symp, L<br>Asym, R | EF, H     | 0.3-0.8                                | 0.5   | 0.7 ± 0.2 | 12           | 0.5-1.0                 | 0.6   | 0.7 ± 0.2   |           |
|            |     |     |            |               |                                                                                               |                    | —         | 0.2-0.8                                | 0.3   | 0.5 ± 0.2 | 7            | 0.3-0.8                 | 0.5   | 0.5 ± 0.2   |           |
|            |     |     |            |               |                                                                                               |                    |           | —                                      | —     | 0.4 ± 0.2 | 6            | 27.5-141.0              | 65.8  | 71.1 ± 39.7 |           |
| LL10       | 65  | F   | A          | 400           | Onset after cancer surgery.                                                                   | Asym, L<br>Symp, R | H, T      | 0.1-2.3                                | 0.7   | 0.8 ± 0.5 | 45           | 0.1-2.3                 | 0.7   | 0.8 ± 0.5   |           |
|            |     |     |            |               |                                                                                               |                    | H, T      | 0.2-0.9                                | 0.4   | 0.5 ± 0.2 | 11           | 31.3-252.0              | 77.7  | 84.8 ± 48.9 |           |
|            |     |     |            |               |                                                                                               |                    |           | —                                      | —     | —         | 4            | 28.3-146.3              | 50.4  | 68.8 ± 54.2 |           |

\*A indicates Asian; AA, African American; C, Caucasian; and H, Hispanic.

†Asym indicates asymptomatic; Symp, symptomatic; L, left; R, right; and Back, backward movement.

‡Features noted include tortuous vessels (T), hyperplastic lymphatic networks (H), extravascular fluorescence (EF), and reflux or retrograde propagation (R).

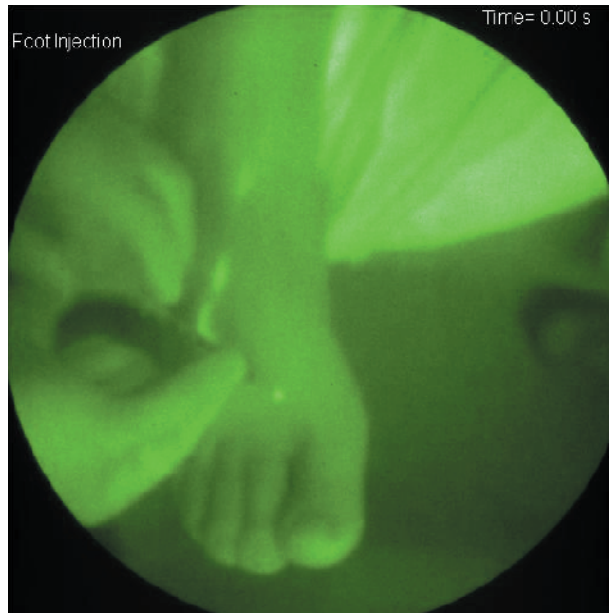

**Video W1.** Movie of the injection, uptake, and subsequent propulsion of ICG from the injection sites in the foot toward the draining lymph nodes. This movie, although not of high quality because of the movement of the foot, illustrates the similarity of the dye front propagation immediately after ICG administration and the propagation of the fluorescent packets within the lymphatics as observed in Videos W2 and W3.

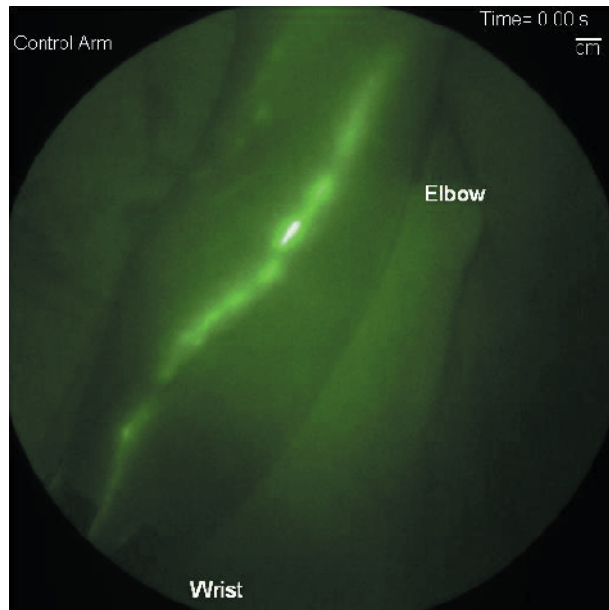

**Video W2.** Movie of active lymphatic propulsion in the right arm of control subject CA10. Movie is approximately three times faster than real time. Black square is covered injection site.

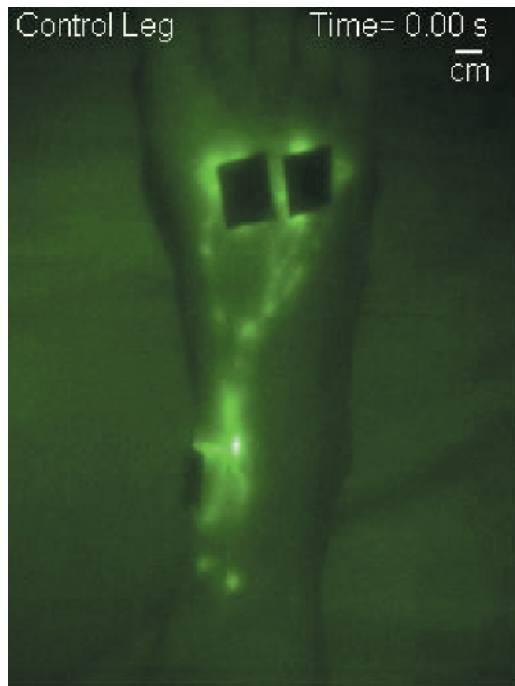

**Video W3.** Movie of active lymphatic propulsion from injection sites in right foot of control subject CL09. Movie is approximately three times faster than real time. Black squares are covered injection sites.

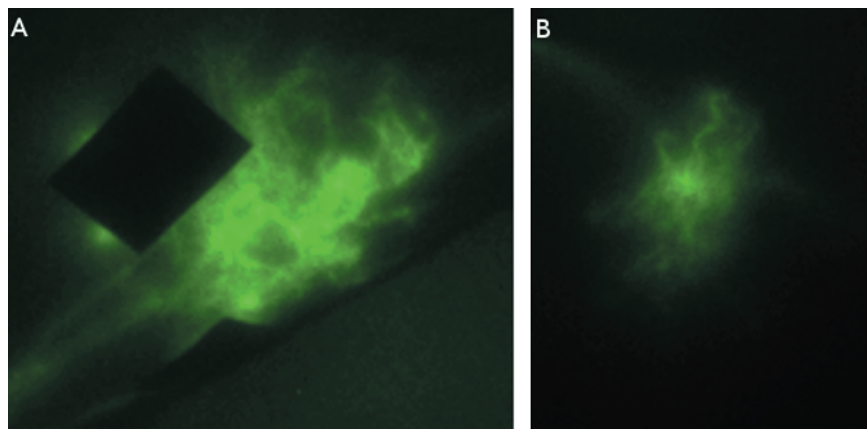

**Figure W1.** Magnified fluorescent images of the lymphatic malformations seen in the asymptomatic arm of subject LA03 illustrating the dense fluorescent capillary networks and tortuous vessels near the (A) injection sites in the wrist and (B) in the upper arm distal to all injection sites.

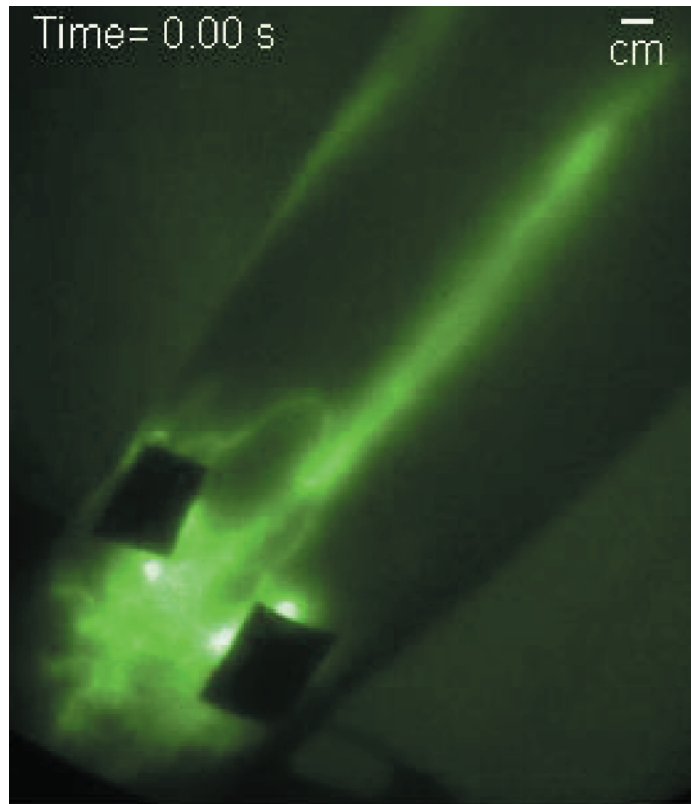

**Video W4.** Movie of lymphatic reflux in asymptomatic arm of subject LA03. Note the backward movement of fluorescence after each forward propulsion event. Movie is approximately three times faster than real time. Black squares are covered injection sites.

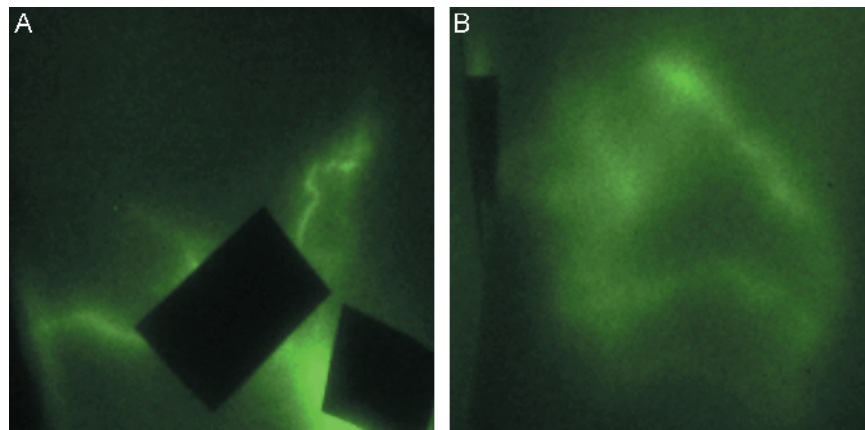

**Figure W2.** Magnified fluorescent images of the tortuous lymphatic vessels seen in the asymptomatic ankle (subject LL05) on both the (A) medial and (B) lateral sides.
